# Supplementary material for: Comparative transcriptomics in Yersinia pestis: a global view of environmental modulation of gene expression
Source: PubMed Central journal article supplement (PMC2231364; doi:10.1186/1471-2180-7-96), 2007-10-29
Supplement: 1471-2180-7-96-S3.pdf [file 1471-2180-7-96-S3.pdf]

**Table S2. List of oligonucleotide primers used in this study**

| <b>Primer name</b> | <b>Sequence (5'-3')</b> |
|--------------------|-------------------------|
| <b>For RT-PCR</b>  |                         |
| YPO1997F           | GCCGATCAGGTATCAAAATTCC  |
| YPO1996R           | TACAGGCGTTCGTTGAATAAATC |
| YPO1996F           | GGGAAGCGGTCGAAAGC       |
| YPO1995R           | GCAACTGAGTGGCAACAC      |
| YPO1995F           | TCGCGCCCTGTCTTGG        |
| YPO1994R           | AAGGGTTCTCCAACCTCGG     |
| YPO1994F           | TTCTCACAGTATTGGAAGCATG  |
| YPO1993R           | GCATCAGCAATGGCAGAAC     |
| YPO3319F           | ACGAATACGCCAGGGCAG      |
| YPO3320R           | ATCAAGGGCGGCATTACG      |
| YPO3320F           | AATGCCGCCCTTGATGC       |
| YPO3321R           | ATTGGTGGTGTTCGGGTAC     |
| YPO1087F           | CGCTTCGGGGAACCTTGG      |
| YPO1088R           | GCTTCTTGCCCTCCTTCC      |
| YPO0882F           | GCTGAGGAACTGGGACTG      |
| YPO0881R           | ACTCGGCTTCGGTCATG       |
| YPO0883F           | CCACCCAATCTGCTGTATCC    |
| YPO0882R           | GTTCGGAAACTGCATCACAC    |
| YPO0884F           | GAGGGAACACCTGTGATATG    |
| YPO0883R           | AGATAAGCTGCTGGTATTCCG   |
| <b>For EMSA</b>    |                         |
| YPO2958F           | ACAGGGCTATCTGACGGG      |
| YPO2958R           | GAAAACGACGTTGCCAGG      |
| YPO0682F           | CGTTAGTTCGGCGTGGG       |
| YPO0682R           | ACGGGCTGAACCATAGGG      |
| YPO1310F           | TGGCGTGACGGCAACC        |
| YPO1310R           | AACCCCTTACCTGTTCCC      |
| YPO3340F           | AGGGATCACCAGGAAGGG      |
| YPO3340R           | ACGCCTCTAGCAAATTTATG    |
| YPO0988F           | TTACCGTTGGCTTCTCC       |
| YPO0988R           | AACCGTTAATAAAAGTGTGG    |
| YPO2651F           | CCTTCCGTGAGTCATTGG      |
| YPO2651R           | CCTTCAGGCTGCTATGGG      |
| YPO1735F           | GCGTCTTTTATTGGACATGC    |
| YPO1735R           | CCGATAAATCAGTTTGAAGC    |
| YPO2404F           | GAATGCCTGCGTGAGG        |
| YPO2404R           | CACCCGATGAGTTGTTAC      |
